# Supplementary material
Source: Elsevier journal article supplement (https://www.sciencedirect.com/science/article/pii/S0025775321000324)
Supplement: mmc2 [file S0025775321000324:mmc2.docx]

**Supplementary material *Table 1.*** Association of comorbidities and previous treatments with mortality: crude OR and adjusted to Charlson-Age Index OR.

|  | OR | 95% CI | p | Adjusted OR | 95% CI | p |
| --- | --- | --- | --- | --- | --- | --- |
| Charlson Age Index | 1.477 | 1.343-1.625 | 0.000 |  |  |  |
| **Comorbidities** |  |  |  |  |  |  |
| Chronic kidney disease | 4.133 | 2.220-7.694 | 0.000 |  |  |  |
| Atrial fibrillation/flutter | 3.863 | 2.394-6.234 | 0.000 |  |  |  |
| Chronic heart disease | 3.008 | 2.010-4.503 | 0.000 |  |  |  |
| Hypertension* | 2.891 | 1.872-4.464 | 0.000 | 1.469 | 0.903-2.389 | 0.121 |
| Any immunosupressive condition | 2.366 | 1.296-4.321 | 0.005 |  |  |  |
| Dementia | 2.338 | 1.173-4.664 | 0.016 |  |  |  |
| DM | 1.937 | 1.273-2.948 | 0.002 |  |  |  |
| Dyslipidemia* | 1.634 | 1.104-2.418 | 0.014 | 0.990 | 0.642-1.528 | 0.965 |
| Previous cancer | 1.701 | 1.040-2.780 | 0.034 |  |  |  |
| Smokers and previous smokers | 1.474 | 0.968-2.244 | 0.071 |  |  |  |
| Chronic lung disease | 1.421 | 0.917-2.203 | 0.116 |  |  |  |
| Cerebrovascular disease | 1.548 | 0.822-2.912 | 0.176 |  |  |  |
| Connective disease | 1.261 | 0.400-3.977 | 0.693 |  |  |  |
| Liver disease | 0.774 | 0.289-2.070 | 0.610 |  |  |  |
| Peripheral arterial disease | 1.915 | 0.643-5.704 | 0.244 |  |  |  |
| **Previous treatments** |  |  |  |  |  |  |
| Previous anticoagulation | 3.726 | 2.336-5.944 | 0.000 | 1.885 | 1.129-3.147 | 0.015 |
| Previous statins | 1.098 | 0.713-1.691 | 0.672 | 0.790 | 0.494-1.261 | 0.323 |
| Previous ACEI/ARB | 1.472 | 0.991-2.186 | 0.055 | 1.109 | 0.725-1.697 | 0.634 |

*Association of hypertension and dyslipidemia with mortality were adjusted to Charlson-Age Index. Rest of comorbidities are already included in Charlson-Age Index.

ACEI/ARB: angiotensin-converting enzyme inhibitor/angiotensin-receptor blocker.

**Supplementary material.** Figure 1. Kaplan Meier survival analysis according to hypoalbuminemia on admission.
